# Supplementary material
Source: publisher site journal article supplement (https://www.dovepress.com/article/442940)
Supplement: Supplementary file 1 [file get_supplementary_file.php]

**Supplement.**

**Table S1.** **Demographics and Baseline Characteristics of Patients With Inadequate IOP Lowering.**

| **Patient** | **1** | **2** | **3** | **4** | **5** | **6** | **Pooleda**  **(n=6)** |
| --- | --- | --- | --- | --- | --- | --- | --- |
| **Age, years** | 51 | 59 | 59 | 69 | 67 | 69 | 62.3 (7.2) |
| **Sex, n (%)** | Male | Male | Female | Male | Male | Female | 83% Male |
| **Race, n (%)** | White | White | White | White | White | Black/African American | 83% White |
| **Ethnicity** | Non- Hispanic | NR | Non-Hispanic | Non-Hispanic | Non-Hispanic | Non- Hispanic | 67% Non-Hispanic |
| **Diagnosis** | H40.1131  POAG, bilateral, mild | H40.023  OA with borderline findings, high risk, bilateral | H40.1132  POAG, bilateral, moderate | H40.023  OA with borderline findings, high risk, bilateral | 365.04  OHT | H40.1131  POAG, bilateral, mild | 83% OAG |
| **Comorbidity, Yes/No** | No | No | Yes | Yes | No | Yes | 50% had a comorbidity |
| **Comorbidity Type(s)** | N/A | N/A | Systemic Hypertension | Systemic Hypertension | N/A | Smoker, Diabetes, Systemic Hypertension, Otherb | 50% had systemic hypertension |
| **IOP-Lowering Product(s) at Index (Prior to Switch to LBN)** | travoprost | travoprost | travoprost | travoprost | brimonidine/timolol combination product | bimatoprost | 83% were on PGA monotherapy prior to switch |
| **Study Eye IOP at Index Visit, mm Hg** | 25 | 28 | 25 | 27 | 18 | 19 | 23.7 (4.2) |

IOP, Intraocular pressure; LBN, latanoprostene bunod 0.024%; OA, open angle; OAG, open-angle glaucoma; OHT, ocular hypertension; PGA, prostaglandin analog; POAG, primary open-angle glaucoma; SD, standard deviation.

aPooled data are presented as mean (SD) for age and IOP, and as % for all other parameters.

bOther diagnoses were cataract and arthritis.
